# Supplementary material for: A Novel Bayesian DNA Motif Comparison Method for Clustering and Retrieval
Source: PLoS Comput Biol. 2008 Feb 29;4(2):e1000010. doi: 10.1371/journal.pcbi.1000010 (PMC2265534; doi:10.1371/journal.pcbi.1000010)
Supplement: Table S1 — Comparison of the Yeast motif library to previous works (0.02 MB XLS) [file pcbi.1000010.s007.xls]

## Sheet: similarity to literature
	Supplementary table 1
	Comparison to previous works
Transcription factors with previously known motif:
TF	Harbison	MacIsaac	BLiC
ABF1	1.913	2.614	2.561
ACE2	2.1	0.899	1.366
AFT2	1.249	1.534	2.111
BAS1	2.128	1.774	2.002
CAD1	1.98	1.919	1.728
CBF1	1.979	2.322	2.413
CIN5	0.358	0.331	1.728
FKH1	2.052	2.064	2.286
FKH2	1.857	1.776	2.286
GAL4	1.452	1.373	1.955
GCN4	1.74	2.151	1.832
GLN3	2.088	1.702	3.234
HAP1	1.784	1.295	2.143
HAP4	1.378	1.501	1.398
HSF1	1.673	3.092	3.548
INO2	0.826	1.479	1.626
INO4	2.218	2.388	2.412
LEU3	2.39	2.683	2.111
MBP1	1.851	1.794	2.175
MCM1	1.766	2.656	3.091
MSN2	1.658	1.782	1.662
NRG1	1.278	1.178	1.302
PHO4	1.637	1.747	1.769
RAP1	1.95	2.308	3.063
RCS1	1.578	1.526	2.113
REB1	2.187	2.414	2.344
RPN4	2.941	2.801	2.933
SIP4	1.875	1.273	1.888
SKN7	0.986	0.973	2.076
STB5	0.711	0.719	1.013
STE12	1.651	1.768	1.755
SUM1	1.562	1.721	2.254
SUT1	0.177	0.618	1.407
SWI4	1.649	1.725	1.795
SWI6	1.138	0.641	1.795
TEC1	1.75	1.849	1.625
TYE7	0.907	0.711	1.044
UME6	1.951	2.114	2.763
YAP1	1.736	1.483	1.706
YAP7	1.665	1.97	1.728
legend
TF	Name of the transcription factor
Harbison,MacIsaac.BLiC	Similarity of the discovered motif to the motif from the literature
Transcription factors without a previously known motif
TF	condition	Harbison	macIsaac	BLiC
FHL1	RAPA	89.1853	0.0302529	102.671
FHL1	SM	84.4775	0.0556743	98.2887
FHL1	YPD	92.166	0.0355956	102.654
MET4	SM	4.38586	3.31965	7.61756
MET4	YPD	2.81295	6.33354	9.82509
NDD1	YPD	17.5013	13.9197	19.8033
PHD1	BUT90	15.0279	6.06897	20.4001
PHD1	YPD	7.52193	7.85973	20.6388
RFX1	YPD	7.3984	7.41251	7.45159
RLR1	YPD	7.42385	3.21262	4.3206
SFP1	H2O2Hi	0	0	4.20709
SFP1	H2O2Lo	0.514401	0.421408	3.27522
SFP1	SM	19.1794	23.4551	28.342
SFP1	YPD	0	0	2.92932
SNT2	YPD	13.6155	13.6442	13.5163
SOK2	BUT14	13.1173	0	20.6955
SPT2	YPD	12.6862	4.26504	4.44441
STB1	YPD	10.7079	9.92884	11.4126
THI2	Thi-	6.79368	8.32349	2.59211
THI2	YPD	0	0	1.98194
legend
TF	Name of the transcription factor
condition	Environmental condition of the ChIP-chip assay
Harbison,MacIsaac.BLiC	Enrichment (-log10 hypergeometric p-value)
	of sequences with the motif among the sequences bound by the TF
