# Supplementary material for: A Novel Bayesian DNA Motif Comparison Method for Clustering and Retrieval
Source: PLoS Comput Biol. 2008 Feb 29;4(2):e1000010. doi: 10.1371/journal.pcbi.1000010 (PMC2265534; doi:10.1371/journal.pcbi.1000010)
Supplement: Table S2 — Transcription factors with condition-dependent binding which alter their targets. (0.02 MB XLS) [file pcbi.1000010.s008.xls]

## Sheet: tf_altered_binding
			Supplementary table 2
			Transcription factors with condition dependent binding which alter their targets
TF	Condition1	Condition2	#bound Cond1	#bound Cond2	#bound both
ADR1	HEAT	YPD	16	28	3
AFT2	H2O2Hi	H2O2Lo	51	76	17
AFT2	H2O2Hi	YPD	51	20	6
AFT2	H2O2Lo	YPD	76	20	5
ARG81	SM	YPD	27	26	8
ARO80	SM	YPD	31	29	8
BAS1	SM	YPD	17	39	6
CHA4	SM	YPD	27	8	0
DAL80	RAPA	YPD	31	14	1
DAL81	RAPA	YPD	72	35	9
DAL82	RAPA	SM	58	62	28
DAL82	RAPA	YPD	58	11	2
DAL82	SM	YPD	62	11	2
DIG1	Alpha	BUT14	99	57	9
DIG1	Alpha	BUT90	99	39	12
DIG1	BUT14	YPD	57	66	18
GAL4	GAL	RAFF	32	37	12
GAL4	GAL	YPD	32	18	5
GAL4	RAFF	YPD	37	18	6
GAT1	RAPA	SM	49	63	7
GAT1	RAPA	YPD	49	8	0
GAT1	SM	YPD	63	8	0
GCR2	SM	YPD	58	36	6
GLN3	RAPA	SM	79	42	8
GLN3	RAPA	YPD	79	13	4
GLN3	SM	YPD	42	13	3
GZF3	H2O2Hi	RAPA	18	42	3
GZF3	H2O2Hi	YPD	18	8	0
GZF3	RAPA	YPD	42	8	0
HAP2	RAPA	YPD	54	28	8
HAP4	H2O2Lo	YPD	31	54	0
HAP5	SM	YPD	39	22	3
IME4	H2O2Hi	YPD	48	36	1
LEU3	SM	YPD	32	31	14
MAC1	H2O2Hi	YPD	15	37	6
MBP1	H2O2Hi	H2O2Lo	92	59	27
MBP1	H2O2Hi	YPD	92	103	38
MBP1	H2O2Lo	YPD	59	103	22
MET31	SM	YPD	14	23	4
MET32	SM	YPD	42	49	14
MIG2	H2O2Hi	YPD	8	23	0
MOT3	H2O2Hi	SM	9	18	0
MOT3	H2O2Hi	YPD	9	13	0
MOT3	SM	YPD	18	13	2
MSN2	Acid	H2O2Hi	33	74	13
MSN2	Acid	H2O2Lo	33	45	7
MSN2	Acid	RAPA	33	69	0
MSN2	H2O2Hi	RAPA	74	69	1
MSN2	H2O2Lo	RAPA	45	69	1
MSN4	Acid	H2O2Hi	15	67	3
MSN4	Acid	H2O2Lo	15	21	1
MSN4	Acid	RAPA	15	79	1
MSN4	Acid	YPD	15	44	6
MSN4	H2O2Hi	H2O2Lo	67	21	10
MSN4	H2O2Hi	RAPA	67	79	0
MSN4	H2O2Hi	YPD	67	44	7
MSN4	H2O2Lo	RAPA	21	79	3
MSN4	H2O2Lo	YPD	21	44	2
MSN4	RAPA	YPD	79	44	1
NRG1	H2O2Hi	H2O2Lo	108	46	17
NRG1	H2O2Hi	YPD	108	68	23
PDR1	H2O2Lo	YPD	18	68	0
PHO2	H2O2Hi	SM	14	30	1
PHO2	H2O2Hi	YPD	14	32	0
PHO2	SM	YPD	30	32	2
PHO4	Pi-	YPD	24	59	1
PUT3	H2O2Lo	SM	10	32	0
PUT3	H2O2Lo	YPD	10	14	0
PUT3	SM	YPD	32	14	4
RCS1	H2O2Hi	SM	41	26	6
RCS1	H2O2Hi	YPD	41	33	6
RCS1	H2O2Lo	SM	72	26	9
RCS1	H2O2Lo	YPD	72	33	5
RCS1	SM	YPD	26	33	5
REB1	H2O2Hi	H2O2Lo	48	166	22
REB1	H2O2Hi	YPD	48	99	13
ROX1	H2O2Hi	H2O2Lo	40	62	2
ROX1	H2O2Hi	YPD	40	67	3
ROX1	H2O2Lo	YPD	62	67	14
RPH1	H2O2Hi	SM	18	19	0
RPH1	H2O2Hi	YPD	18	10	0
RPH1	SM	YPD	19	10	0
RPN4	H2O2Hi	H2O2Lo	9	70	3
RPN4	H2O2Hi	YPD	9	27	1
RPN4	H2O2Lo	YPD	70	27	1
RTG1	RAPA	SM	42	10	0
RTG3	H2O2Hi	H2O2Lo	28	9	4
RTG3	H2O2Hi	RAPA	28	55	8
RTG3	H2O2Hi	SM	28	32	5
RTG3	H2O2Hi	YPD	28	29	0
RTG3	H2O2Lo	SM	9	32	2
RTG3	H2O2Lo	YPD	9	29	0
RTG3	RAPA	SM	55	32	5
RTG3	RAPA	YPD	55	29	3
RTG3	SM	YPD	32	29	8
SFP1	H2O2Hi	H2O2Lo	8	19	0
SFP1	H2O2Hi	SM	8	37	0
SFP1	H2O2Lo	SM	19	37	0
SIP4	SM	YPD	24	14	0
STE12	Alpha	BUT14	142	123	35
STE12	Alpha	BUT90	142	92	36
STE12	BUT14	YPD	123	75	34
STP1	SM	YPD	69	21	7
TEC1	Alpha	BUT14	48	43	10
TEC1	BUT14	YPD	43	37	14
UGA3	RAPA	SM	28	17	0
YAP1	H2O2Lo	YPD	37	68	13
YAP5	H2O2Hi	YPD	9	47	1
YAP6	H2O2Hi	H2O2Lo	67	74	23
YAP6	H2O2Hi	YPD	67	92	27
YAP6	H2O2Lo	YPD	74	92	32
YJL206C	H2O2Hi	YPD	10	22	3
legend
TF	Name of the transcription factor		motif
#bound cond1/2	total number of sequences bound by the TF in the relevant condition
#bound both	total number of sequences bound by the TF in both conditions
